# Supplementary material for: A range of 30–62% of functioning multiciliated airway cells is sufficient to maintain ciliary airway clearance
Source: PubMed Central journal article supplement — Eur Respir J. 2024 Oct 10;64(4):2301441. doi: 10.1183/13993003.01441-2023 (PMC11469306; doi:10.1183/13993003.01441-2023), 2024-10-10

# A range of 30–62% of functioning multiciliated airway cells is sufficient to maintain ciliary airway clearance

Niki T. Loges, June Kehlet Marthin , Johanna Raidt, Heike Olbrich, Inga M. Höben, Sandra Cindric, Diana Bracht, Julia König , Cynthia Rieck, Sebastian George, Tim Luis Kloth, Kai Wohlgemuth, Petra Pennekamp, Bernd Dworniczak, Mathias G. Holgersen , Jobst Römel , Christian Schmalstieg, Isabella Aprea, Jann Mortensen, Kim G. Nielsen and Heymut Omran

| How many functional multiciliated airway cells are sufficient to maintain ciliary airway clearance? |                                                                                                                      |                                                                                                                                      |                                                                                                                                                                              |
|-----------------------------------------------------------------------------------------------------|----------------------------------------------------------------------------------------------------------------------|--------------------------------------------------------------------------------------------------------------------------------------|------------------------------------------------------------------------------------------------------------------------------------------------------------------------------|
| Studied individuals                                                                                 | <p>Healthy male individuals (n=5)</p> <p>Healthy female individuals (n=26)</p>                                       | <p>Male PCD individuals (n=5)</p>                                                                                                    | <p>Female carriers (n=6)</p>                                                                                                                                                 |
| Clinical presentation                                                                               | Healthy                                                                                                              | Severe abnormal respiratory symptoms with bronchiectasis and abnormal lung function (reduced FEV <sub>1</sub> )                      | Normal or mild respiratory symptoms                                                                                                                                          |
| Immunofluorescence analysis to identify ODA defects                                                 | <p>Normal DNAH5 localisation in all MCCs (normal ODA composition)</p>                                                | <p>Abnormal DNAH5 localisation in all MCCs (abnormal ODA composition)</p>                                                            | <p>30–62% of MMCs show normal DNAH5 localisation (other MMCs exhibit ODA defects due to random X-chromosome inactivation)</p>                                                |
| <i>In vitro</i> ciliary clearance assay (in ALI cultures)                                           | <p>Healthy individuals show normal ciliary clearance transport</p>                                                   | <p>Male PCD individuals with hemizygous pathogenic variants in DNAAF6 show no <i>in vitro</i> ciliary clearance transport</p>        | <p>Female carriers show directed ciliary clearance transport and reduced particle velocity</p>                                                                               |
| <i>In vivo</i> measurement of ciliary clearance (radioaerosol studies)                              | <p>Tracheobronchial velocity (bolus transport): 2.0–6.0 mm·min<sup>-1</sup></p> <p>Lung retention (24 h): normal</p> | <p>Tracheobronchial velocity (bolus transport): 0 mm·min<sup>-1</sup> (severely abnormal)</p> <p>Lung retention (24 h): abnormal</p> | <p>Tracheobronchial velocity (bolus transport): 1.7–3.0 mm·min<sup>-1</sup> (slightly abnormal to normal)</p> <p>Lung retention (24 h): slightly abnormal to normal</p>      |
| Conclusion                                                                                          | <p>Normal ciliary clearance →</p>                                                                                    | <p>No ciliary clearance → <del>→</del></p>                                                                                           | <p>Normal to slightly abnormal ciliary clearance →</p> <p>A range of 30–62% of functioning multiciliated airway cells is sufficient to maintain ciliary airway clearance</p> |

**GRAPHICAL ABSTRACT** Overview of the study. PCD: primary ciliary dyskinesia; FEV<sub>1</sub>: forced expiratory volume in 1 s; ODA: outer dynein arm; MCC: multiciliated cell.

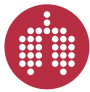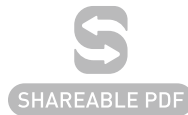

# A range of 30–62% of functioning multiciliated airway cells is sufficient to maintain ciliary airway clearance

Niki T. Loges<sup>1</sup>, June Kehlet Marthin <sup>2,3</sup>, Johanna Raidt<sup>1</sup>, Heike Olbrich<sup>1</sup>, Inga M. Höben<sup>1</sup>, Sandra Cindric<sup>1</sup>, Diana Bracht<sup>1</sup>, Julia König <sup>1</sup>, Cynthia Rieck<sup>1</sup>, Sebastian George<sup>1</sup>, Tim Luis Kloth<sup>1</sup>, Kai Wohlgemuth<sup>1</sup>, Petra Pennekamp<sup>1</sup>, Bernd Dworniczak<sup>1</sup>, Mathias G. Holgersen <sup>2</sup>, Jobst Römel <sup>4</sup>, Christian Schmalstieg<sup>1</sup>, Isabella Aprea<sup>1</sup>, Jann Mortensen<sup>2,5</sup>, Kim G. Nielsen<sup>2,3</sup> and Heymut Omran <sup>1</sup>

<sup>1</sup>Department of General Pediatrics, University Children's Hospital Muenster, Muenster, Germany. <sup>2</sup>Danish PCD Centre, Danish Paediatric Pulmonary Service, Department of Paediatrics and Adolescent Medicine, Rigshospitalet, Copenhagen University Hospital, Copenhagen, Denmark. <sup>3</sup>Department of Clinical Medicine, University of Copenhagen, Copenhagen, Denmark. <sup>4</sup>Department of Pediatric Respiratory Medicine, Immunology and Critical Care Medicine, Charité – Universitätsmedizin Berlin, Corporate Member of Freie Universität Berlin and Humboldt-Universität zu Berlin, Berlin, Germany. <sup>5</sup>Department of Clinical Physiology, Nuclear Medicine and PET, Rigshospitalet, Copenhagen University Hospital, Copenhagen, Denmark.

Corresponding author: Heymut Omran ([Heymut.Omran@ukmuenster.de](mailto:Heymut.Omran@ukmuenster.de))

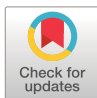

Shareable abstract (@ERSpublications)

**Restoring cilia function in 30–62% of defective respiratory cells is sufficient to improve ciliary clearance in PCD individuals** <https://bit.ly/45PQQg9>

**Cite this article as:** Loges NT, Marthin JK, Raidt J, *et al.* A range of 30–62% of functioning multiciliated airway cells is sufficient to maintain ciliary airway clearance. *Eur Respir J* 2024; 64: 2301441 [DOI: 10.1183/13993003.01441-2023].

This extracted version can be shared freely online.

Copyright ©The authors 2024.

This version is distributed under the terms of the Creative Commons Attribution Non-Commercial Licence 4.0. For commercial reproduction rights and permissions contact [permissions@ersnet.org](mailto:permissions@ersnet.org)

This article has an editorial commentary: <https://doi.org/10.1183/13993003.01573-2024>

Received: 25 Aug 2023  
Accepted: 16 June 2024

## Abstract

**Background** Primary ciliary dyskinesia is a genetic disorder caused by aberrant motile cilia function that results in defective ciliary airway clearance and subsequently leads to recurrent airway infections and bronchiectasis. We aimed to determine: how many functional multiciliated airway cells are sufficient to maintain ciliary airway clearance?

**Methods** To answer this question we exploited the molecular defects of the X-linked recessive primary ciliary dyskinesia variant caused by pathogenic variants in *DNAAF6* (*PIH1D3*), characterised by immotile cilia in affected males. We carefully analysed the clinical phenotype and molecular defect (using immunofluorescence and transmission electron microscopy) and performed *in vitro* studies (particle tracking in air–liquid interface cultures) and *in vivo* studies (radiolabelled tracer studies) to assess ciliary clearance of respiratory cells from female individuals with heterozygous and male individuals with hemizygous pathogenic *DNAAF6* variants.

**Results** Primary ciliary dyskinesia male individuals with hemizygous pathogenic *DNAAF6* variants displayed exclusively immotile cilia, absence of ciliary clearance and severe primary ciliary dyskinesia symptoms. Owing to random or skewed X-chromosome inactivation in six female carriers with heterozygous pathogenic *DNAAF6* variants, 54.3±10% (range 38–70%) of multiciliated cells were defective. Nevertheless, *in vitro* and *in vivo* assessment of the ciliary airway clearance was normal or slightly abnormal. Consistently, heterozygous female individuals showed no or only mild respiratory symptoms.

**Conclusions** Our findings indicate that having 30–62% of multiciliated respiratory cells functioning can generate either normal or slightly reduced ciliary clearance. Because heterozygous female carriers displayed either no or subtle respiratory symptoms, complete correction of 30% of cells by precision medicine could improve ciliary airway clearance in individuals with primary ciliary dyskinesia, as well as clinical symptoms.

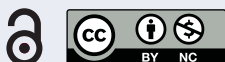

Supplement: ERJ-01441-2023.Shareable.pdf [file ERJ-01441-2023.Shareable.pdf]
